# Supplementary material for: Synthesis and Biological Evaluation of 5′-O-Fatty Acyl Ester Derivatives of 3′-Fluoro-2′,3′-dideoxythymidine as Potential Anti-HIV Microbicides
Source: MDPI journal article supplement (doi:10.3390/molecules27103352), 2022-05-23
Supplement: s1 [file s1]

# SUPPORTING INFORMATION

## Synthesis and Biological Evaluation of 5'-O-Fatty Acyl Ester Derivatives of 3'-Fluoro-2',3'-Dideoxythymidine as Potential Anti-HIV Microbicides

*Hitesh K. Agarwal,<sup>a,b,\*</sup> Bhupender Singh Chhikara,<sup>b</sup> Guofeng Ye,<sup>b</sup> Sitaram Bhavaraju,<sup>b</sup> Ajay Dixit,<sup>b,c</sup> Anil Kumar,<sup>b</sup> Gustavo F. Doncel<sup>d,\*</sup> Keykavous Parang<sup>b,e,\*</sup>*

<sup>a</sup>Department of Pharmaceutical Sciences, School of Pharmacy, South University, 709 Mall Boulevard, Savannah, GA 31406

<sup>b</sup>Department of Biomedical and Pharmaceutical Sciences, School of Pharmacy, University of Rhode Island, 02881, USA

<sup>c</sup>ITC Life Science & Technology Center, #3, 1st Main, Peenya Industrial Area, 1st Phase, Bangalore, 560058, INDIA

<sup>d</sup>CONRAD, Department of Obstetrics and Gynecology, Eastern Virginia Medical School, Norfolk, VA, 23507 USA

<sup>e</sup>Center for Targeted Drug Delivery, Department of Biomedical and Pharmaceutical Sciences, Chapman University School of Pharmacy, Harry and Diane Rinker Health Science Campus, Irvine, California 92618, USA

\*Corresponding authors:

K. Parang: Center for Targeted Drug Delivery, Department of Biomedical and Pharmaceutical Sciences, Chapman University School of Pharmacy, Harry and Diane Rinker Health Science Campus, Irvine, California 92618, USA; Tel.: +1-714-516-5489; Fax: +1-714-516-5481; E-mail: parang@chapman.edu.

G. Doncel: Eastern Virginia Medical School, 601 Colley Avenue, Norfolk, Virginia, 23507, USA; Tel.: +1-757-446-8908; Fax: +1-757-446-5770; E-mail: DoncelGF@evms.edu.

H. K. Agarwal: Department of Pharmaceutical Sciences, School of Pharmacy, South University-Savannah Campus, 709 Mall Boulevard, Savannah, GA 31406, USA; Phone: 912-201-8143; Fax: 912-201-8153; E-mail: hagarwal@southuniversity.edu

| <b>Table of Contents</b>               | <b>Page</b> |
|----------------------------------------|-------------|
| <u><i>In vitro</i> data</u>            |             |
| Figure S1                              | S3          |
| Figure S2                              | S4          |
| <u>NMR data for selected compounds</u> |             |
| Figure S3                              | S5          |
| Figure S4                              | S6          |
| Figure S5                              | S7          |
| Figure S6                              | S8          |
| Figure S7                              | S9          |
| Figure S8                              | S10         |
| Figure S9                              | S11         |
| Figure S10                             | S12         |
| Figure S11                             | S13         |
| Figure S12                             | S14         |

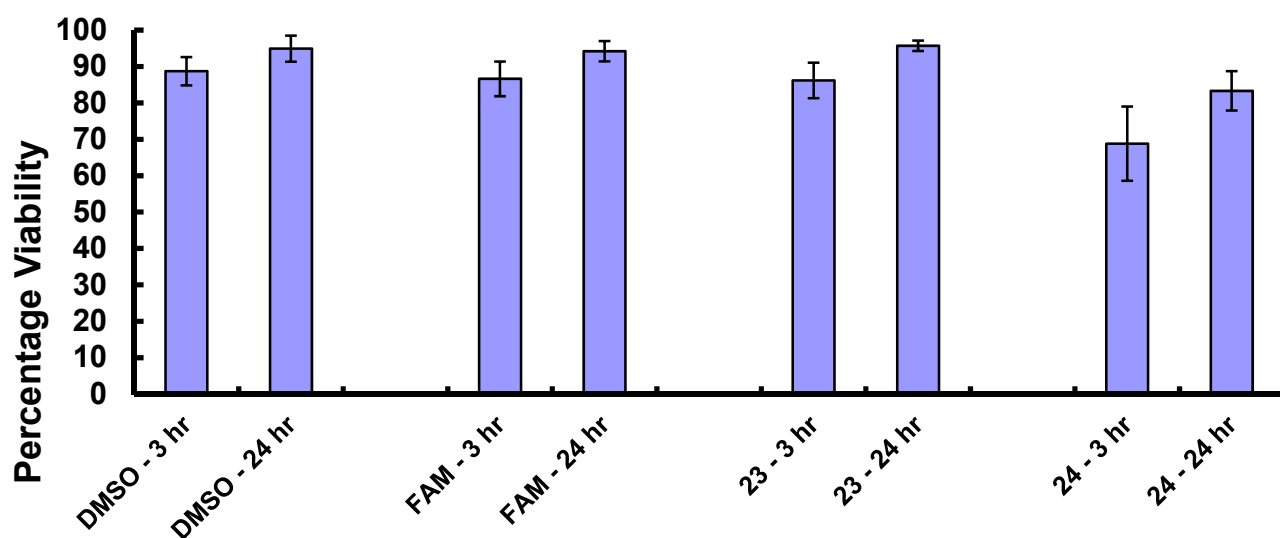

**Figure S1.** Cell viability assay after 3 h and 24 h incubation of **23** and **24** with CCRF-CEM cells. DMSO and FAM were used as positive controls.

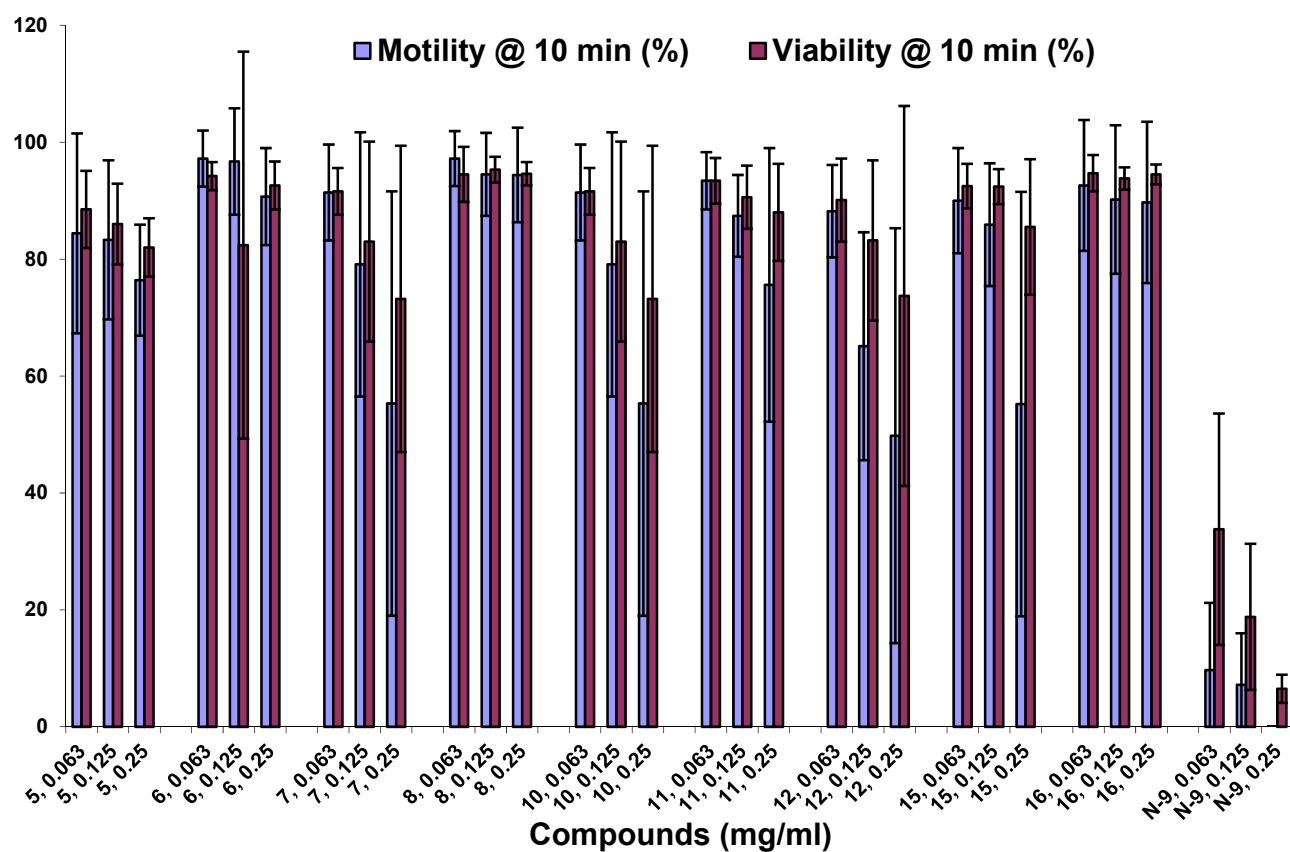

**Figure S2.** *In vitro* assays for spermicidal activity of fatty acyl conjugates of FLT and AZT in comparison to N-9.

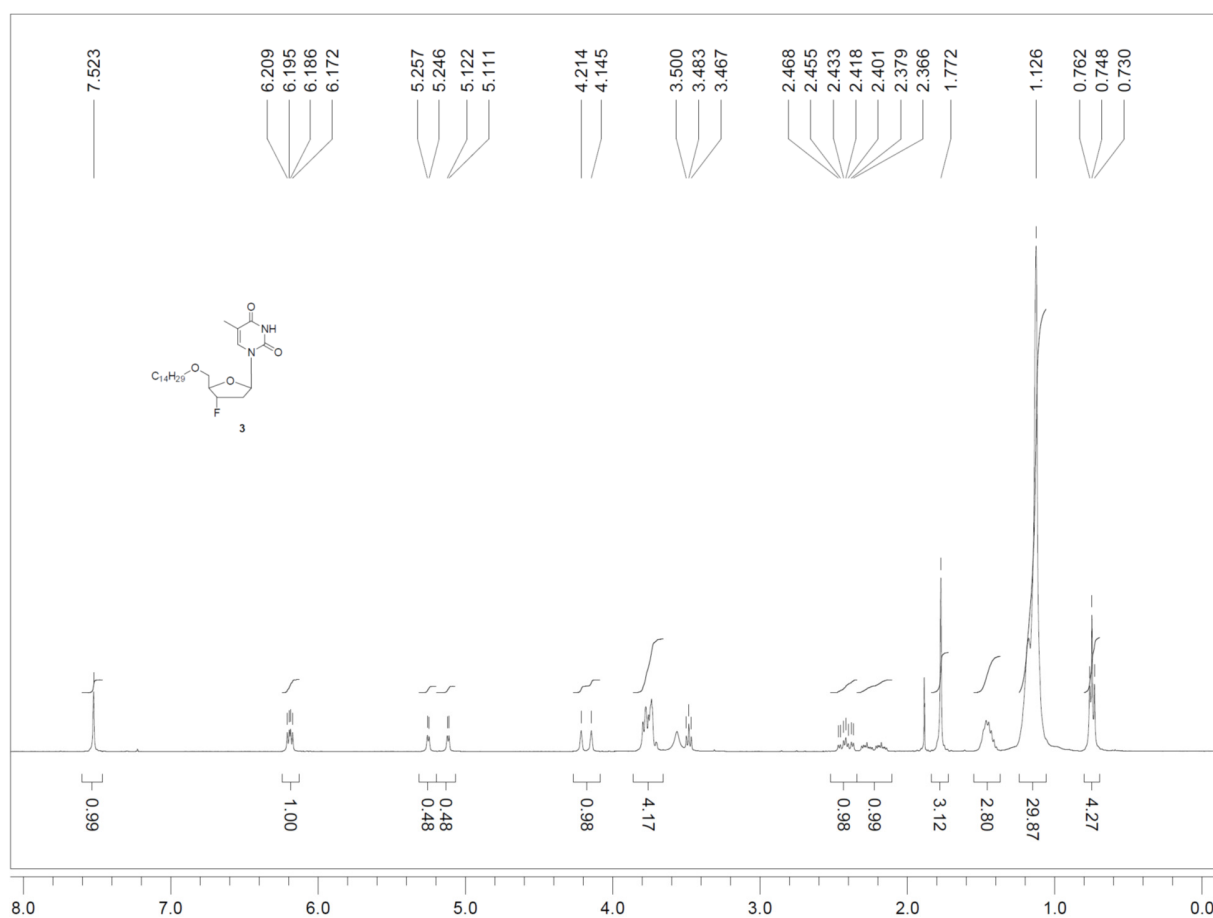

**Figure S3.** <sup>1</sup>H NMR of **3**.

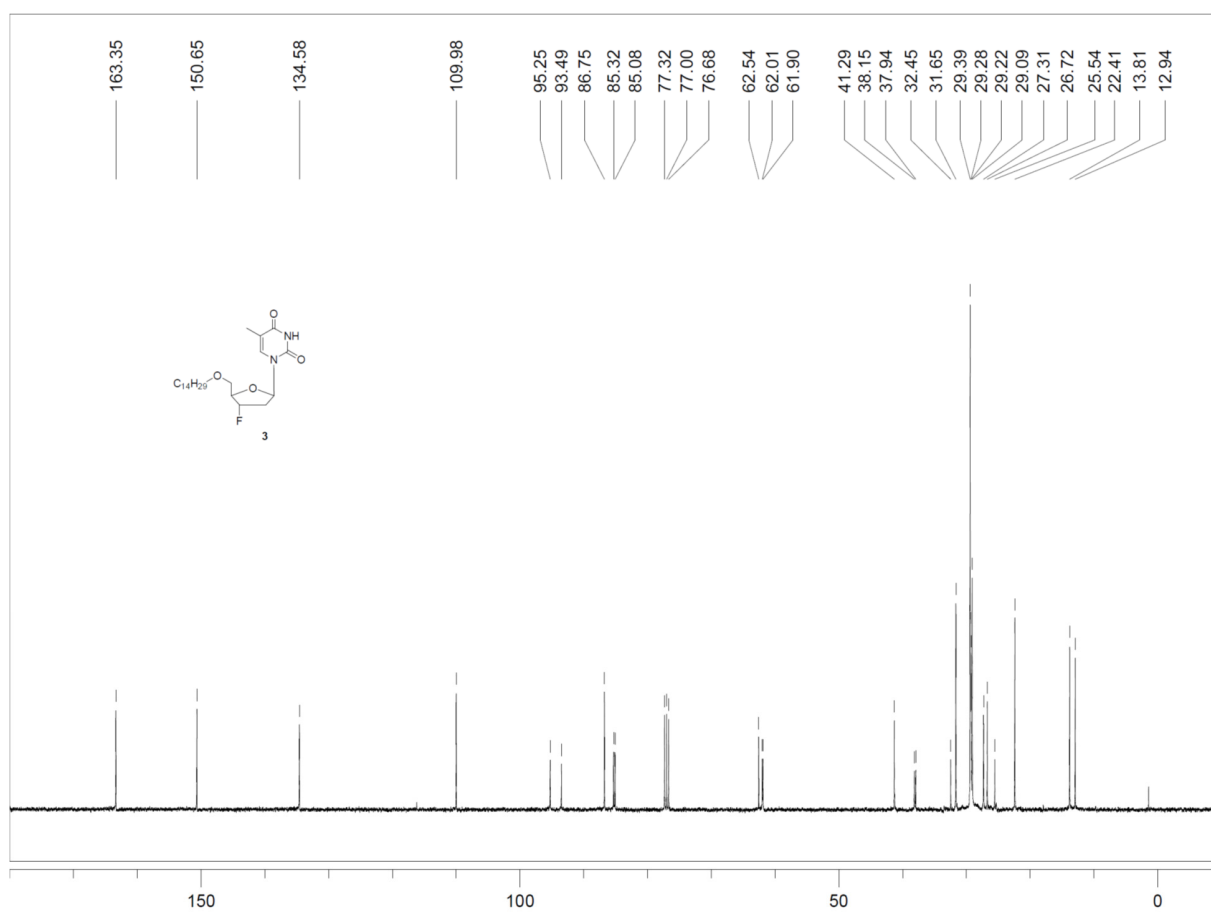

**Figure S4.** <sup>13</sup>C NMR of **3**.

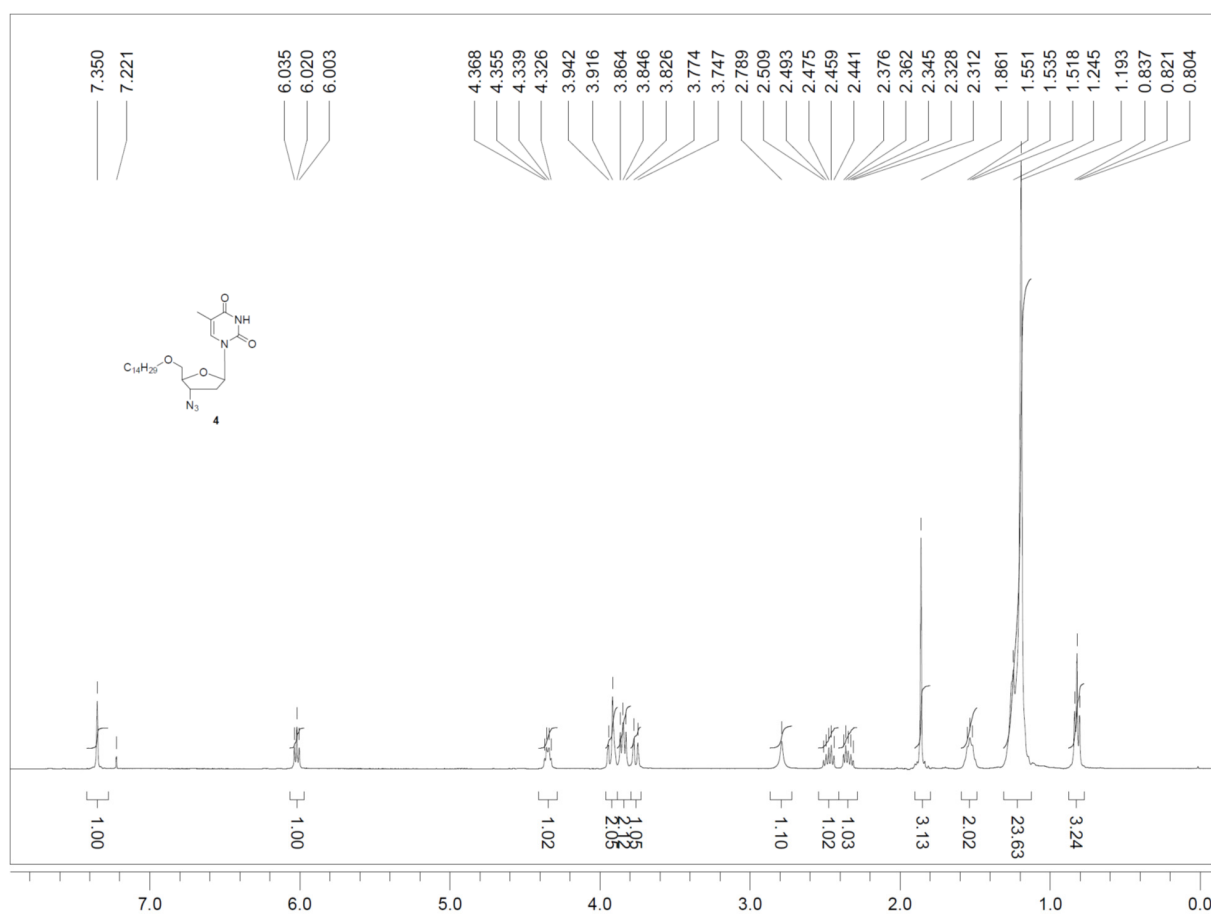

**Figure S5.**  $^1\text{H}$  NMR of 4.

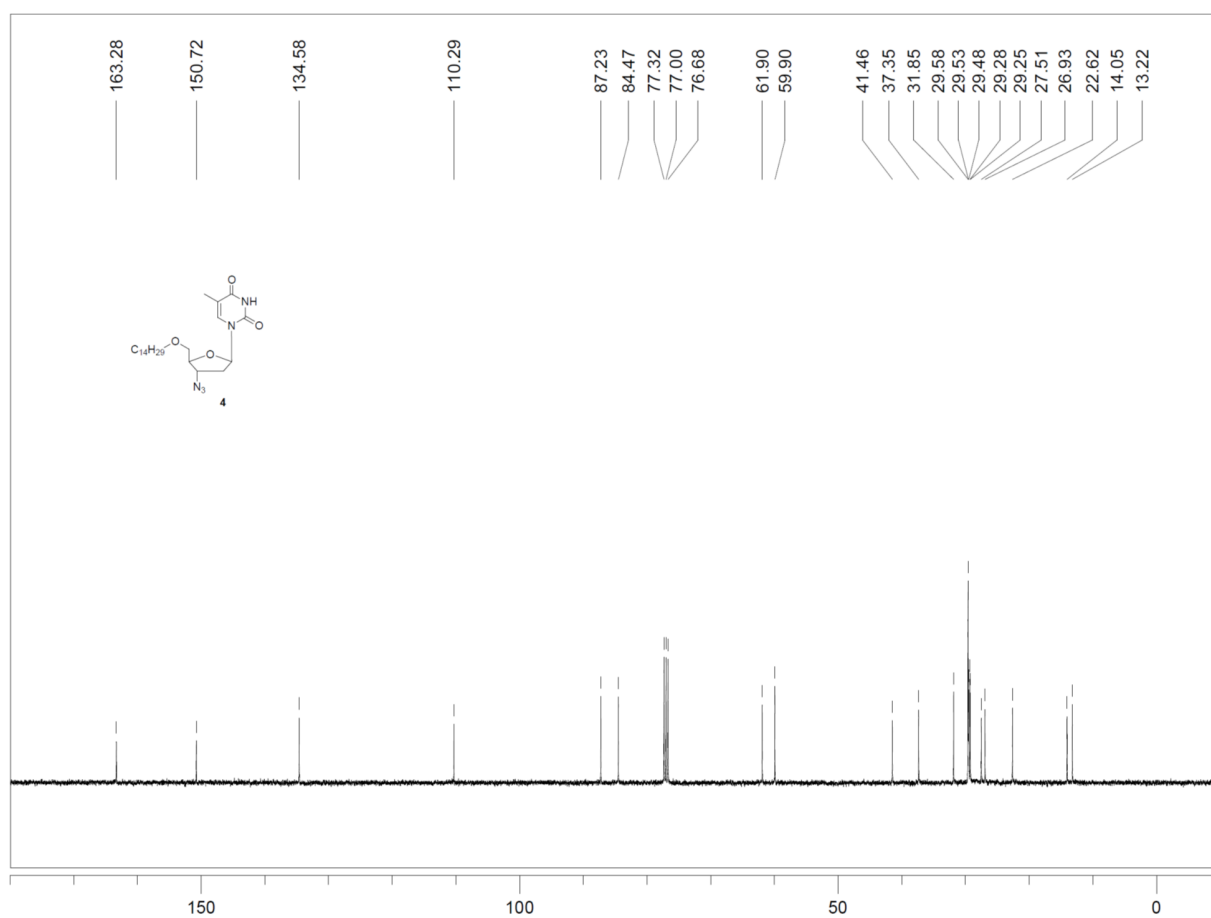

**Figure S6.**  $^{13}\text{C}$  NMR of **4**.



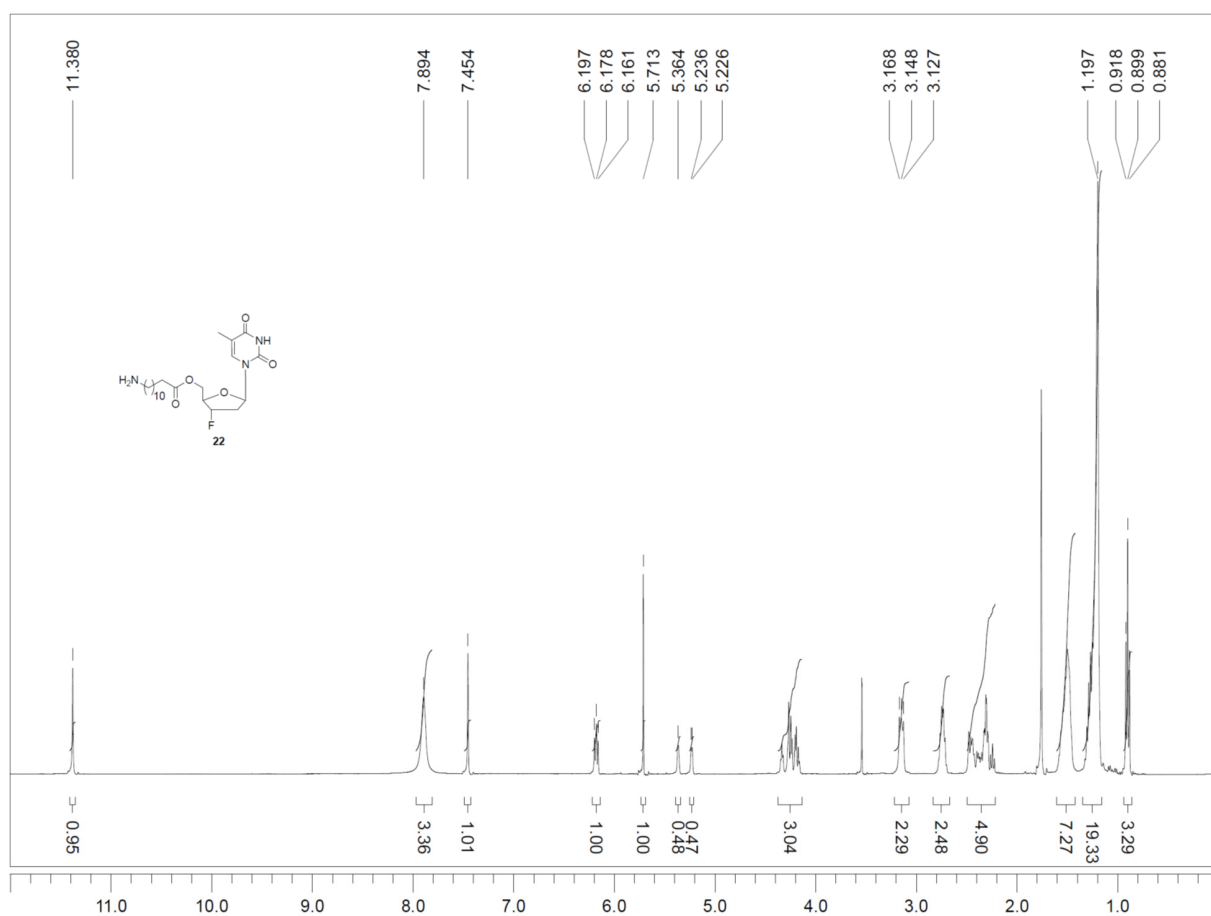

**Figure S7.**  $^1\text{H}$  NMR of **22**.

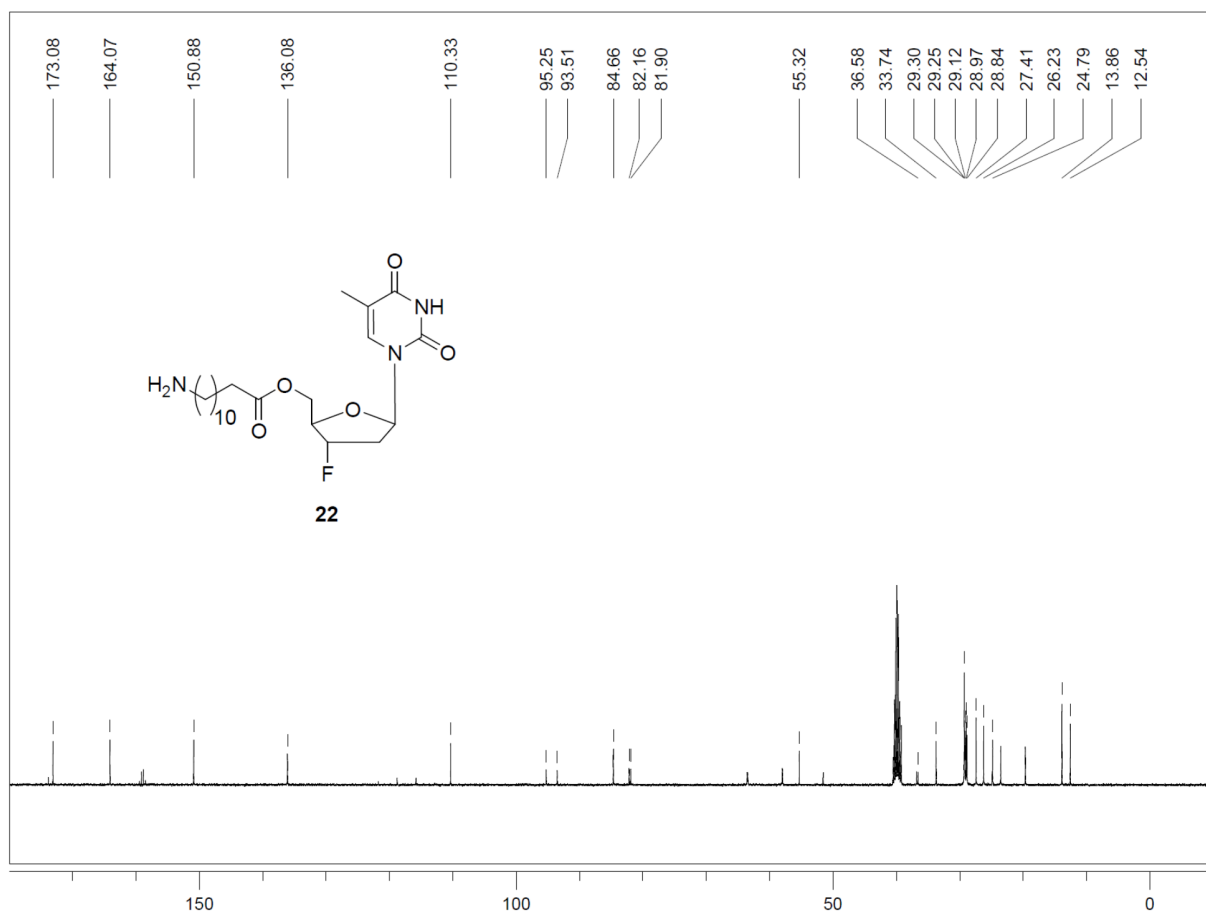

**Figure S8.** <sup>13</sup>C NMR of **22**.

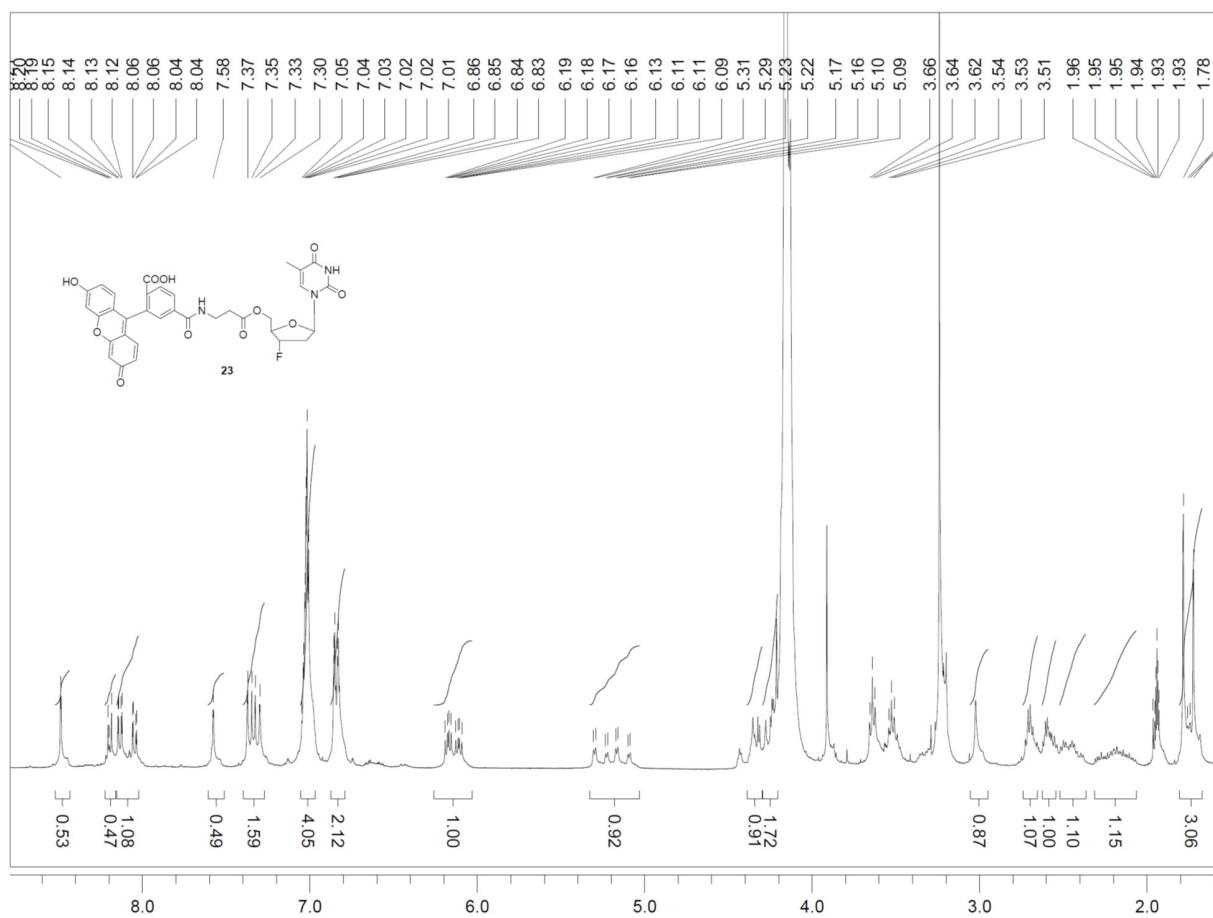

**Figure S9.**  $^1\text{H}$  NMR of **23**.

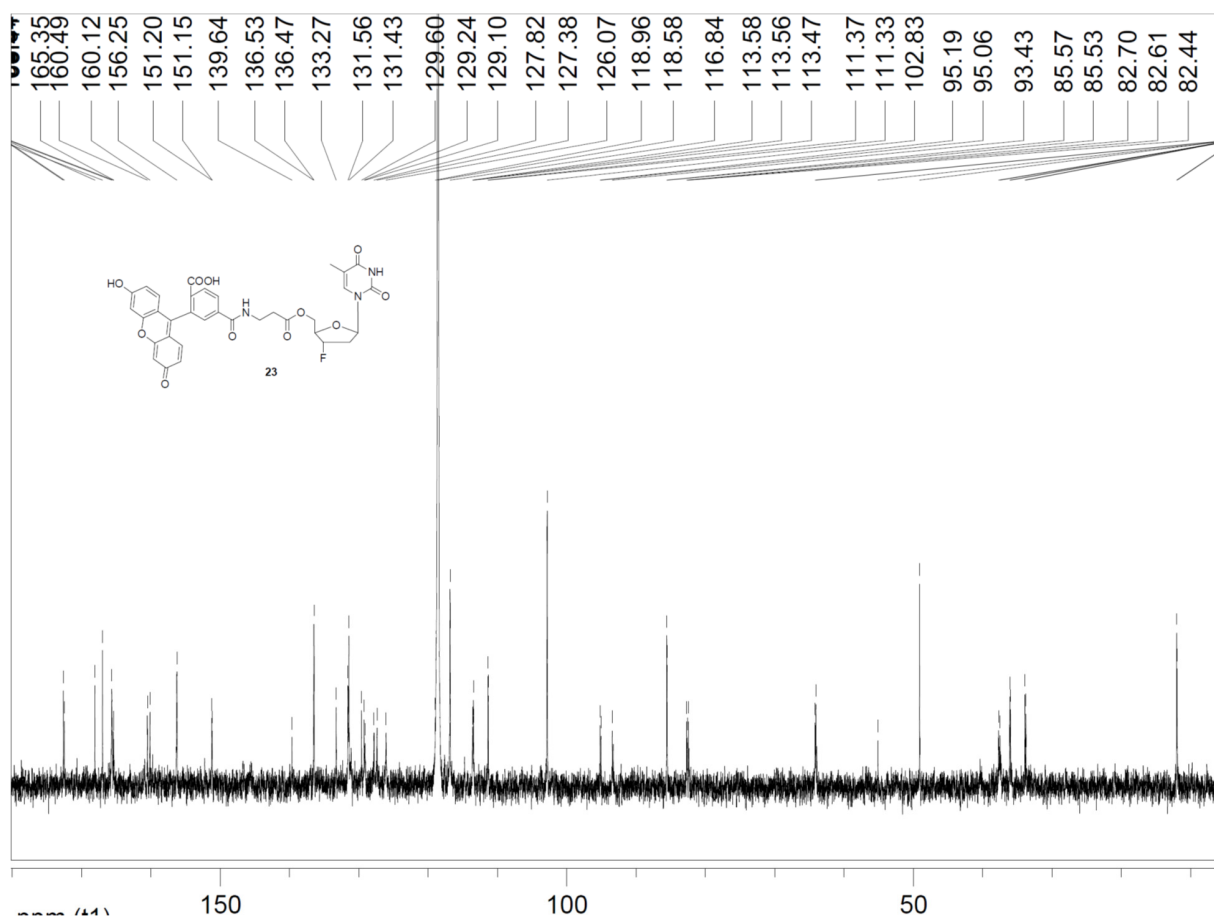

**Figure S10.**  $^{13}\text{C}$  NMR of **23**.

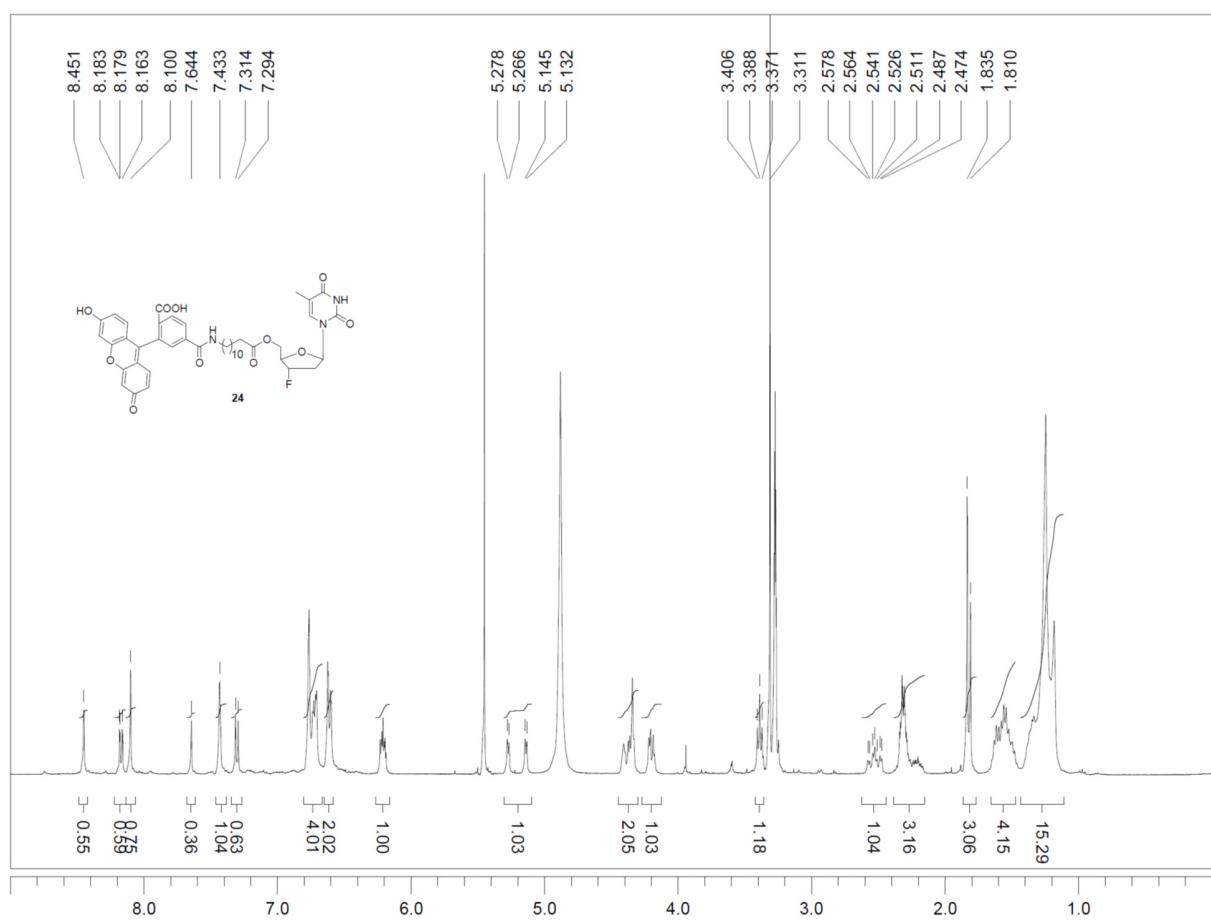

**Figure S11.**  $^1\text{H}$  NMR of 24.

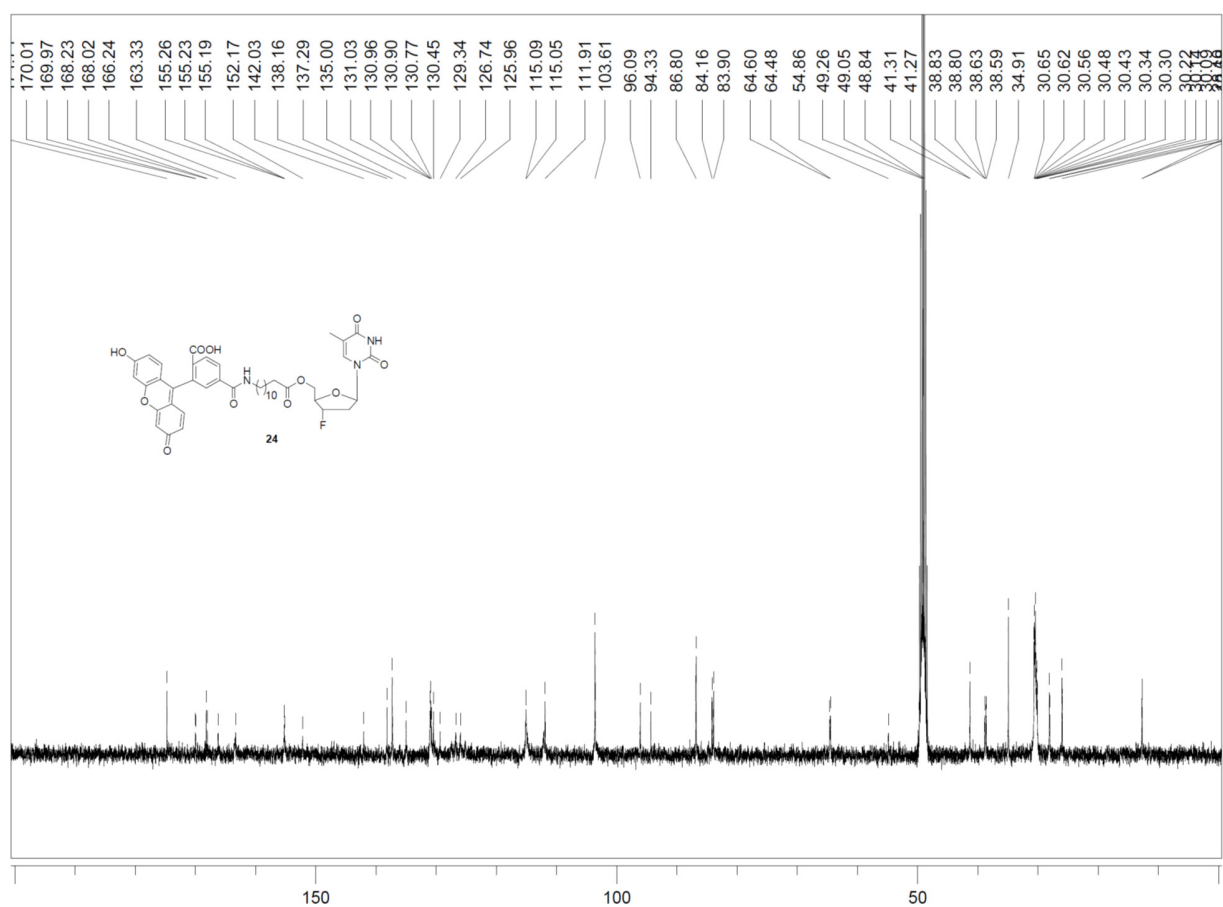

**Figure S12.**  $^{13}\text{C}$  NMR of **24**.
